# Supplementary material for: Water dynamics at electrified graphene interfaces: a jump model perspective
Source: Royal Society of Chemistry journal article supplement (doi:10.1039/d0cp00359j), 2020-01-01
Supplement: d0cp00359j1.pdf [file d0cp00359j1.pdf]

# Supplementary Information

## Water dynamics at electrified graphene interfaces: a jump model perspective

Yiwei Zhang,<sup>†</sup> Guillaume Stirnemann,<sup>‡</sup> James T. Hynes,<sup>†,¶</sup> and Damien Laage<sup>\*,†</sup>

<sup>†</sup>*PASTEUR, Department of Chemistry, École normale supérieure, PSL University,  
Sorbonne Université, CNRS, 75005 Paris, France*

<sup>‡</sup>*CNRS Laboratoire de Biochimie Théorique, Institut de Biologie Physico-Chimique, PSL  
University, Université de Paris, 13 rue Pierre et Marie Curie, 75005, Paris, France*

<sup>¶</sup>*Department of Chemistry, University of Colorado, Boulder, CO 80309, USA*

E-mail: damien.laage@ens.fr

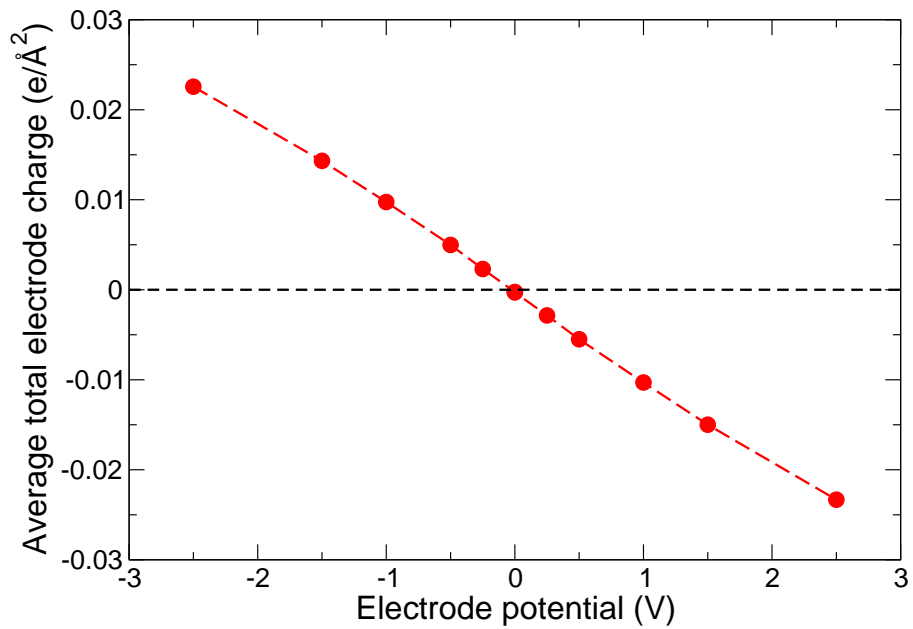

Figure S1: Total electrode charge variations with electrode potential. The potential at the point of zero charge is approximately -0.02 V.

Table S1: Parameters of extended jump model for water molecules at the negatively charged graphene interface (see eqn 2).  $p^{S,W}$  are the fractions of OH groups in each population, and  $p^{W \rightarrow S}$  the probability to jump to state S when starting from state W. The jump times at the negative electrode consider all H-bond jumps from the specified initial state to any new acceptor in the S, W and bulk states (jump times at the positive electrode in fig 4 do not consider the S state which is unstable at these potentials). The jump angles are taken to be  $\Delta\theta^{WW}=68^\circ$  and  $\Delta\theta^{SW}=90^\circ$  based on figure 2; no frame reorientation is considered in state S because the graphene interface is fixed. The extended jump model average reorientation time in the interfacial water layer is determined as  $\langle\tau_{\text{reor}}^{\text{EJM}}\rangle = p^S\tau_{\text{reor}}^S + p^W\tau_{\text{reor}}^W$ . The EJM eqn 2 is applied to the W and S states to obtain  $\tau_{\text{reor}}^{S,W}$ , as described in eqn S1, where the two possible jump types starting from an initial W state are considered.

| Potential (V) | $\tau_{\text{jump}}^S$ (ps) | $\tau_{\text{jump}}^W$ (ps) | $\tau_{\text{frame}}^W$ (ps) | $p^S$ | $p^W$ | $p^{W \rightarrow S}$ | $\langle\tau_{\text{reor}}^{\text{EJM}}\rangle$ (ps) |
|---------------|-----------------------------|-----------------------------|------------------------------|-------|-------|-----------------------|------------------------------------------------------|
| 0             | 1.1                         | 3.82                        | 8.7                          | 0.08  | 0.92  | 0.3                   | 3.64                                                 |
| -0.25         | 1.5                         | 3.78                        | 7.5                          | 0.11  | 0.89  | 0.3                   | 3.34                                                 |
| -0.5          | 1.7                         | 3.57                        | 6.7                          | 0.13  | 0.87  | 0.3                   | 3.07                                                 |
| -1            | 2.3                         | 3.58                        | 6.0                          | 0.17  | 0.83  | 0.3                   | 2.92                                                 |
| -1.5          | 2.9                         | 3.62                        | 6.1                          | 0.20  | 0.80  | 0.3                   | 3.01                                                 |
| -2.5          | 3.7                         | 3.7                         | 6.7                          | 0.23  | 0.77  | 0.3                   | 3.28                                                 |

$$\begin{aligned}
\frac{1}{\tau_{\text{reor}}^S} &= \frac{1}{\tau_{\text{jump}}^S} \left[ 1 - \frac{1 \sin(5\Delta\theta^{SW}/2)}{5 \sin(\Delta\theta^{SW}/2)} \right] \\
\frac{1}{\tau_{\text{reor}}^W} &= \frac{1 - p^{W \rightarrow S}}{\tau_{\text{jump}}^W} \left[ 1 - \frac{1 \sin(5\Delta\theta^{WW}/2)}{5 \sin(\Delta\theta^{WW}/2)} \right] \\
&\quad + \frac{p^{W \rightarrow S}}{\tau_{\text{jump}}^W} \left[ 1 - \frac{1 \sin(5\Delta\theta^{SW}/2)}{5 \sin(\Delta\theta^{SW}/2)} \right] + \frac{1}{\tau_{\text{frame}}^W}
\end{aligned} \tag{S1}$$

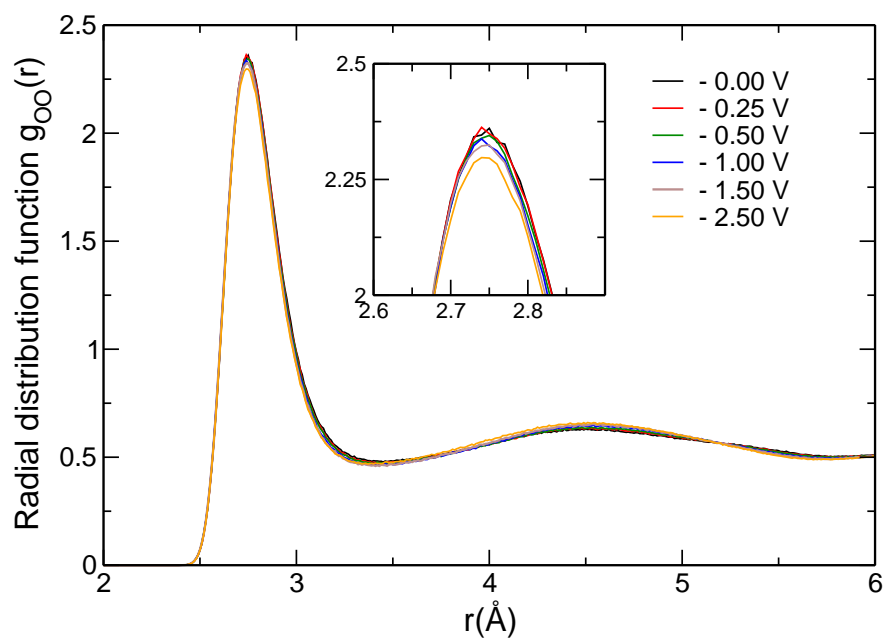

Figure S2: Oxygen radial distribution function around water oxygen atoms within the negative interface first hydration layer.

## References

- (1) Laage, D.; Hynes, J. T. On the Molecular Mechanism of Water Reorientation. *J Phys Chem B* **2008**, *112*, 14230–14242.
